# Supplementary material for: Employing high-frequency alternating magnetic fields for the non-invasive treatment of prosthetic joint infections
Source: PubMed Central journal article supplement (PMC5548742; doi:10.1038/s41598-017-07321-6), 2017-08-08
Supplement: 41598_2017_7321_MOESM1_ESM.pdf [file 41598_2017_7321_MOESM1_ESM.pdf]

**Manuscript Title:** Employing high-frequency alternating magnetic fields for the non-invasive treatment of prosthetic joint infections

**Authors:** Rajiv Chopra, Sumbul Shaikh, Yonatan Chatzinoff, Imalka Munaweera, Bingbing Cheng, Seth M. Daly, Yin Xi, Chenchen Bing, Dennis Burns, David E Greenberg

**Supplementary Table S1: Material & Physical Constants used in Finite Element Simulations**

| <b>Material Constants for FEA Simulations</b> |              |                   |
|-----------------------------------------------|--------------|-------------------|
| <i>Parameter</i>                              | <i>Value</i> | <i>Units</i>      |
| <b>316 Stainless Steel</b>                    |              |                   |
| Thermal conductivity                          | 16.30        | W/(m.K)           |
| Electrical conductivity                       | 1.35e6       | S/m               |
| Specific Heat Capacity                        | 0.5          | J/(g.K)           |
| Density                                       | 8000         | Kg/m <sup>3</sup> |
| <b>Copper</b>                                 |              |                   |
| Thermal conductivity                          | 400          | W/(m.K)           |
| Electrical conductivity                       | 6.00e7       | S/m               |
| Specific Heat Capacity                        | 385          | J/(kg.K)          |
| Density                                       | 8700         | Kg/m <sup>3</sup> |
| <b>Saline</b>                                 |              |                   |
| Thermal conductivity                          | piecewise    | W/(m.K)           |
| Electrical conductivity                       | 5.50e-6      | S/m               |
| Specific Heat Capacity                        | piecewise    | J/(kg.K)          |
| Density                                       | piecewise    | Kg/m <sup>3</sup> |
| <b>Plastic Tube</b>                           |              |                   |
| Thermal conductivity                          | 0.18         | W/(m.K)           |
| Electrical conductivity                       | 5.50e-6      | S/m               |
| Specific Heat Capacity                        | 1470         | J/(kg.K)          |
| Density                                       | 1190         | Kg/m <sup>3</sup> |
| <b>Air</b>                                    |              |                   |
| Thermal conductivity                          | piecewise    | W/(m.K)           |
| Electrical conductivity                       | 1.00e-6      | S/m               |
| Specific Heat Capacity                        | piecewise    | J/(kg.K)          |
| Density                                       | piecewise    | Kg/m <sup>3</sup> |

| <b>Muscle</b>                       |                             |                      |
|-------------------------------------|-----------------------------|----------------------|
| Thermal conductivity                | 0.49                        | W/(m.K)              |
| Electrical conductivity             | 0.60                        | S/m                  |
| Specific Heat Capacity              | 3421                        | J/(kg.K)             |
| Density                             | 1090                        | Kg/m <sup>3</sup>    |
| Perfusion                           | 37                          | ml/kg/min            |
| Body Temperature                    | 37                          | C                    |
| Blood Density                       | 1060                        | Kg/m <sup>3</sup>    |
| <b>Washer Simulation Parameters</b> |                             |                      |
| Coil Radius                         | 0.0175                      | in                   |
| Coil Diameter                       | 1                           | in                   |
| Coil Pitch                          | 0.04                        | In                   |
| Number of Turns                     | 37                          | 1                    |
| Washer Height                       | 0.04                        | In                   |
| Washer outer radius                 | 0.735                       | In                   |
| Washer Inner Radius                 | 0.45                        | in                   |
| Water Height                        | 1.1                         | in                   |
| Coil Power                          | 20                          | Watts                |
| Initial Temperature                 | 23                          | degC                 |
| Frequency                           | 610                         | kHz                  |
| Velocity Field in Water             | $6.5e-5 r + 6.5e-5 z$       | m/s                  |
| Heat Source                         | mf.Qh                       | Watts/m <sup>3</sup> |
| Boundary Temperature                | $19 + \text{step}(t=10)*30$ | C                    |
| <b>Knee Simulation Parameters</b>   |                             |                      |
| Coil Radius                         | 6                           | cm                   |
| Frequency                           | 500                         | kHz                  |
| Number of Turns                     | 20                          | 1                    |
| Pitch                               | 1                           | Cm                   |
| Air Temperature                     | 19                          | C                    |
| Excitation Current                  | 250                         | Amps                 |
